# Supplementary material
Source: PubMed Central journal article supplement (PMC3289292)
Supplement: 1120791109_pnas.201120791SI.pdf [file 1120791109_pnas.201120791SI.pdf]

# Supporting Information

Kato et al. 10.1073/pnas.1120791109

## SI Materials and Methods

**Cell Culture.** The BL2 Burkitt's lymphoma cell line was cultured in RPMI medium 1640 containing 10% FCS (vol/vol), 100  $\mu$ M NEAA (Gibco), 1 mM sodium pyruvate, 100 units per mL penicillin, and 100  $\mu$ g/mL streptomycin. BL2- $\Delta$ C-AIDER cells, which are a BL2 clone harboring Jp8BdelER (Jp8Bdel fused with the hormone-binding domain of the estrogen receptor [ER]), were cultured with 0.5  $\mu$ g/mL puromycin. To activate AIDER proteins, 4-hydroxytamoxifen (4-OHT) was added to a concentration of 1  $\mu$ M.

**Microarray.** DNA was labeled according to the Affymetrix sample preparation protocol and hybridized to Human Promoter 1.0R Arrays. Slides were scanned with an Affymetrix GeneChip scanner. Six independent experiments were performed for each sample. Microarray data were analyzed using CisGenome.

**Analysis of Microarray Data.** Normalized signal intensities were generated from Affymetrix CEL files using CisGenome (1). The parameters used to detect peaks are as follows: moving average (MA) is used to combine neighboring probes, false discovery rates is estimated from permutation test, the window boundary is set to 250 bp, the MA cutoff is set to 3, the max allowable gap within a region is set to 200 bp, the max run of insignificant probes with a region is set to 5, the minimum region length is set to 150 bp, and the minimum number of significant probes within a region is set to 5. We retained only peaks where the FDR is <0.3. All probe sequences were mapped to the hg19 genome assembly.

**SOLiD Sequencing.** Templated microbeads were prepared according to Applied Biosystem's standard protocol. Sequencing runs were performed on the SOLiD 3 Plus system (Applied Biosystems) under standard conditions.

**Analysis of SOLiD DNA-Sequencing Data.** Linkers were removed from the sequenced tags by using a custom Perl script, and the resulting tags were mapped to the human genome (assembly hg19) using the Bowtie program with standard parameters (2). Breakage points were summed over 100-bp intervals across the entire genome in 10-bp increments for each control and 4-OHT-treated replicate. Significant differences in breakage frequency were calculated using the EdgeR program (3), with background dispersion values for both conditions calculated over shifting 10,000-bp intervals. This program provided *P* values and FDR values for each 100-bp interval, measuring the likelihood of observing the differences in breakage points across the two conditions given the selected background breakage rates. Regions with low FDR values overlapping the promoter (defined as 500 bases upstream of the RefSeq-defined transcriptional start site) and gene definitions were extracted. To increase confidence in the potential AID targets, regions with significant *P* values were clustered via a single-linkage clustering procedure, which joined any regions within 1 kb of another peak on the genome. The resulting clusters of regions were then overlaid with low-FDR regions, and the most promising candidate genes containing the lowest FDR values (FDR < 0.1), high numbers of *P* value clusters, or both were selected for further validation testing (Table S2). This layer of additional clustering was chosen to facilitate the testing of genes with the highest likelihood of breakage. Indeed, both the *MALAT1* and *SNHG3* loci (Fig. S3A) displayed these patterns,

which were likely to be consistent with high levels of AID-induced cleavage activity.

**Statistical Parameters of SOLiD DNA-Sequencing Data.** In terms of data integrity, our technique is consistent with existing technologies. A summary of the characteristics of the sequenced libraries is provided in Table S8. The read redundancy ranges between 1.23 and 1.28; this redundancy rate is slightly higher than most ChIP-seq experiments (1.05–1.15) but much lower than other sequencing technologies. The slightly higher redundancy rates likely result from high numbers of breakages found in repeat regions (Fig. S5A). Importantly, the low redundancy values argue against problems arising from the number of cycles used, indicating the library does not suffer from amplification bias. An overview annotating the genomic locations of breakage sites in each library is also provided (Fig. S5B). The source of the discrepancies in target identification between this dataset and others instead likely stems from lack of depth. Each sequenced library covers the entire genome at roughly 0.8 $\times$  coverage. Although the coverage of the as-currently undefined AID-targeted “break-ome” is not known, at present coverage levels, it appears possible to detect regions that are substantially affected by AID-induced breakage while not capturing everything that has been identified.

We have plotted the distribution of the square root of the absolute common dispersion values across the two conditions in all local genome windows which were used to approximate local background breakage rates for comparisons across samples (Fig. S5C). Very few genomic regions exceed an expected error rate of 20% in the measurements. We observe a bimodal distribution in the error rates, with the first peak corresponding to extremely low expected error (<1%) and the second peak found between  $\approx$ 1–20%. The bimodal distribution implies that the AID breakage in a subset of genome regions is more highly reproducible relative to other regions; interestingly, this is not derived from relative expression values in the two peaks. Regardless, in either peak region the error rates are consistent with existing deep-sequencing techniques and enable robust identification of significant differences between breakage counts across conditions.

**Mutation Analysis.** To analyze SHM mutations, BL2- $\Delta$ C-AIDER cells were treated with 4-OHT (1  $\mu$ M) for 24 h, and the genomic DNA was purified by phenol:chloroform extraction. PCR was performed by using *Pyrobest* or PrimeSTAR GXL DNA polymerase (TaKaRa) with the following amplification conditions: 95  $^{\circ}$ C for 5 min, 30 cycles at 95  $^{\circ}$ C for 30 s, 58  $^{\circ}$ C for 30 s, and 68  $^{\circ}$ C for 1 min. After purification, the PCR fragments were A-tailed and cloned with the pGEM-T Easy Vector System (Promega). Nucleotide sequences were determined with the ABI PRISM 3130xl Genetic Analyzer (Applied Biosystems). Only unique mutations were counted, and the mutation frequency was calculated from the number of mutations per total bases analyzed.

**REPFIND Analysis.** Analysis with the REPFIND Web server (<http://zlab.bu.edu/repfind/form.html>) used the following parameters: *P* value cutoff, 0.0001; minimum repeat length, 3; maximum repeat length, infinity; low complexity filter, on; statistical background, query sequence; order of background Markov model, 1.

**ChIP.** ChIP was performed as described (4).





**MALAT1**

↓

ATAGAAGATAGAAAAATATAAGCCAAAAATGGATAAAATAGCAGTGAATAAATGAGGAAATTTGGTAACCAATTTATTTTA  
 AAAGCCATCAATTTAATTTCTGGTGGTGCAGAAGTTAGAAGTTAAAGCTTGAAGATGAGGGTGTTTACGTAGACCAGAACCA  
 ATTTAGAAGAATACTTGAAGCTAGAAGGGGAAGTTGGTTAAAAATCACATCAAAAAGCTACTAAAAGGACTGGTGTATTTAAAA  
 AAACTAAGGCAGAAGGCTTTTGAAGAGTTAGAAGAATTTGAAGGCCTTAAATATAGTAGCTTAGTTTAAAAATGTGAAGGA  
 CTTCCTAAGCGAAGTAATCAAGATCAAGAGTAATTACCAACTTAATGTTTTCGATTGGACTTTGAGTTAAGATTATTTTTTA  
 AATCTGAGGACTAGCATTAAATGACAGCTGACCCAGGTGCTACACAGAAGTGGATTGAGTCTAGGAAGACAGCAGCAGAC  
 AGGATTCAGGAACCAAGTGTGATGAAGCTAGGACTGAGGAGCAAGCGAGCAAGCAGCAGTTCGGTGGTGAAGATAGGAAAAGAG  
 TCCAGGAGCCAGTGCATTTGGTGAAGGAAGCTAGGAAGAAGGAAGGAGCGCTAACGATTTGGTGGTGAAGCTAGGAAAAGGAT  
 TCCAGGAAGGAGCGAGTGCATTTGGTGAAGGAAGCTAGGAAGAAGGAAGGAGCGCTAACGATTTGGTGGTGAAGCTAGGAAAAGGAT  
 TCCAGGAAGGAGCGAGTGCATTTGGTGAAGGAAGCTAGGAAGAAGGAAGGAGCGCTAACGATTTGGTGGTGAAGCTAGGAAAAGGAT  
 TGCGTAGAGGATCCTAGACCAGCATGCCAGTGTGCCAAGGCCACAGGAAAGCGAGTGGTTGGTAAAAATCCGTGAGGTCGGCAA  
 TATGTTGTTTTCTGGAACCTACTTATGGTAACCTTTTATTTATTTTCTAATATAATGGGGGAGTTTCGTACTGAGGTGTAAGG  
 GATTT

**BCL7A**

CTGCTGTCGGGCTGTCATCCTCCAGGCCCGGGGCGCTGACATTTGGGCCACTCTCGGTCTCCCTTCATCTGGGCGCGCATTAG  
 CTCGGTCCGGCCGGTTCCGCTGCAGTGAACAGCAAGATGCGGCACCCAGGTACCTGATCATCGCAGATTTCTCCCGGGGC  
 TCTGTTCTGAGGCCCTAAAAGTGCCTTGTAGATGGGACCAGGGTCAATTTGGCAGTAGCAGCGCTGGTCTCAGTCTGGTAC  
 TGAAGTCAGGAATGGCTTAAGGTGAAATCGTGGTCTCTGGTGAAGCTCAGCGAAGACCCCTCGCCTTGTATTATGACAAGAGAA  
 CTTCTGGGGGCGGAGGAAGAGTCCCTGTACGATGCTGATCATCATTGAGCTTTTGTCTGAGCAGAAAATCTTTAGTACTCAAG  
 GTCGAGAGTCTCTGGTGTCTGCCCTGCACCAGGCACCTTCCTACAACCCTAGTTTTCCAAAAGGACAAAAGCCTGGGGCAGGCGA  
 CGTCTAGCTCGCATTGAAACAGGGCCCGGGCCAGCAGAGATGCGCGATGCCAACTCTTTCCAAGAGCACCTCGGCTCCCGAA  
 CCGGTGCCCTCAACTCGGAGAAGTCAAGAGACCCGCAAGAACTTGCACGACTGCACC

**CUX1**

GGTAGCGCGCTGTGGCCAGAAGTCCCAGGTTGCAGCGCGGAGGGAACCGGGATGTCGGGGGGTCCCGGGTCCCAGCGCT  
 TAGAATGCTCTAGGCGCGCTGGTGTCTGGGAGGGATAGGAGGTTCTCAGGGCCCTGGGAACTGCAGTACTCCCAACT  
 GCTAAGGTGTGCGTGAAGATAAACTTGGTGAACTTTCTAACCTGGAGGACTGGTACAGTACCTACCGAATACCTTTGGGA  
 GCAAAGCTCGAGATGCAGGCTTGTATCAAACGAAGCGGTTGGATTAACATATTTAAATGGAATCGACAACCTTAATTGTAT  
 ATGCTTGTCTTCTGCTCTGCCTACTAAGAACGATAAAGCCGAGTCATAGTCTGTTATGAAATTTCTGAAATTTCTGCTTAAC  
 AGGAAGAAGACTATGCGAAATATGATTCCGATAAGATAAACTTAAAGGAGTTTAAAGTATTTACTACTAAAATAGATTACT  
 CCAAAGTGTCTATTGTGTAATTAGATTCTGGATGTAATGAACACAGCCGAATGGCATTGATAAAATGGTCTACCCTGTTT  
 TAGTAAAAATAGCTCCCTTTACCAATAATTTAATTCCTGTGCTTACTGTAAAACCCGTTGTGGAGTTTAAAGACAACATTATT  
 ATTATTTTCTCTCTGCTCTCTAAATGTGACATCCTAGCTTAA

**Fig. S2.** Somatic mutations and breakpoint distribution in AID target loci. Red, mutations found in cells treated with 4-OHT for 24 h; green, mutations in 4-OHT nontreated samples; blue, insertions; red line, deletions; arrowheads, break sites in samples treated with 4-OHT for 3 h; arrows, translocation breakpoints shown in Fig. 3.

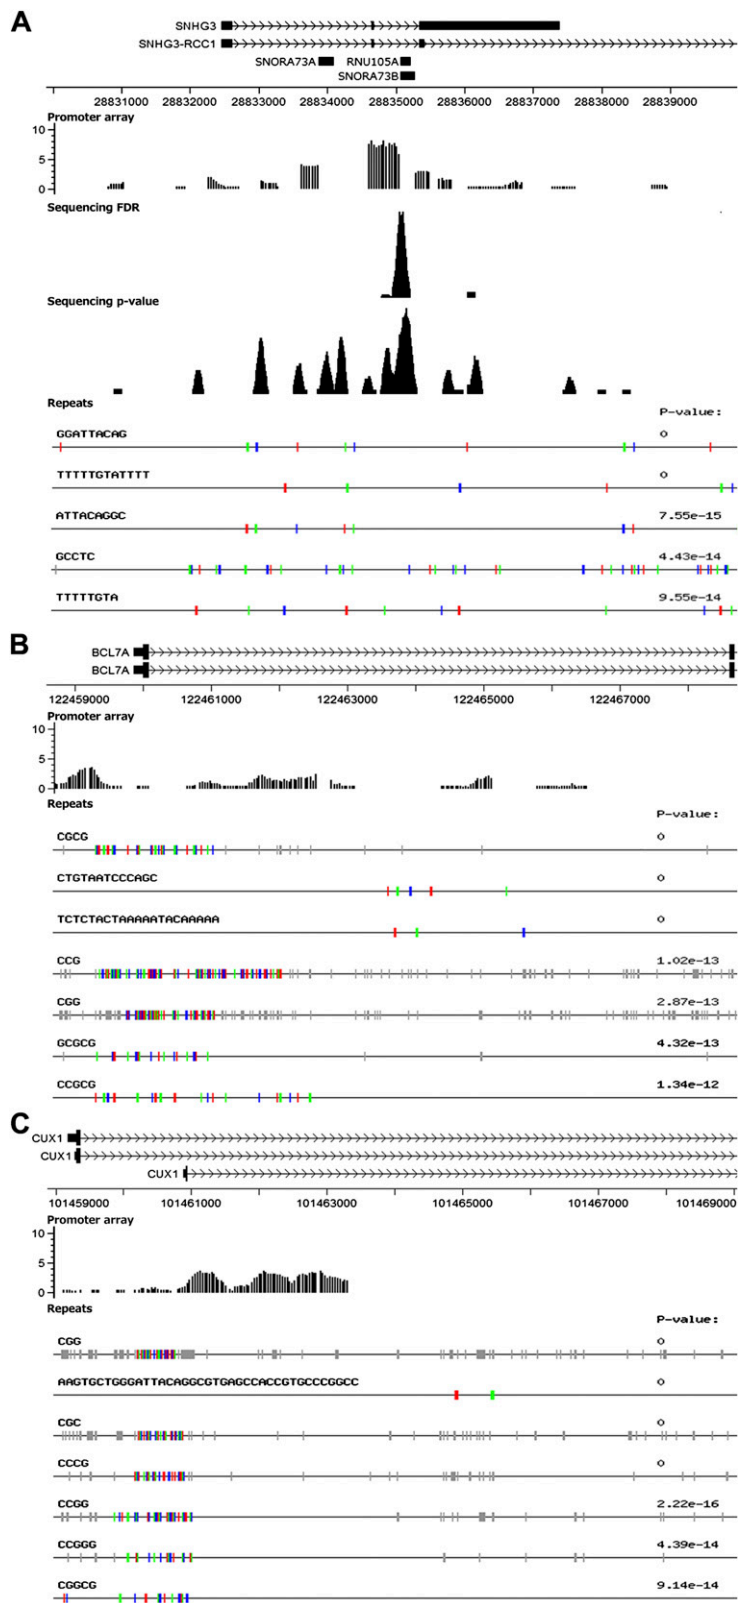

**Fig. 53.** Repeat sequences surrounding the breakage region in AID target genes. (A) *SNHG3* gene. From top to bottom: Representation of a 10-kb segment surrounding the *SNHG3* locus; Breakage signal distribution detected by promoter array (regions without bars do not have array probes); FDR regions by sequencing; *P* value peaks by sequencing; REPFIND analysis showing significant repeat clusters in the *SNHG3* locus. (B and C) *BCL7A* and *CUX1* genes, respectively. From top to bottom: Representation of a 10-kb segment surrounding the cleavage region for each gene; Breakage signal distribution detected by promoter array (regions without bars do not have array probes); REPFIND analysis showing significant repeat clusters in the same region. Motifs depicted as vertical small colored bars indicate the cluster with the most significant *P* value; individual repeats are separated by different colors. *x* axis numbers indicate base positions according to hg19 assembly.



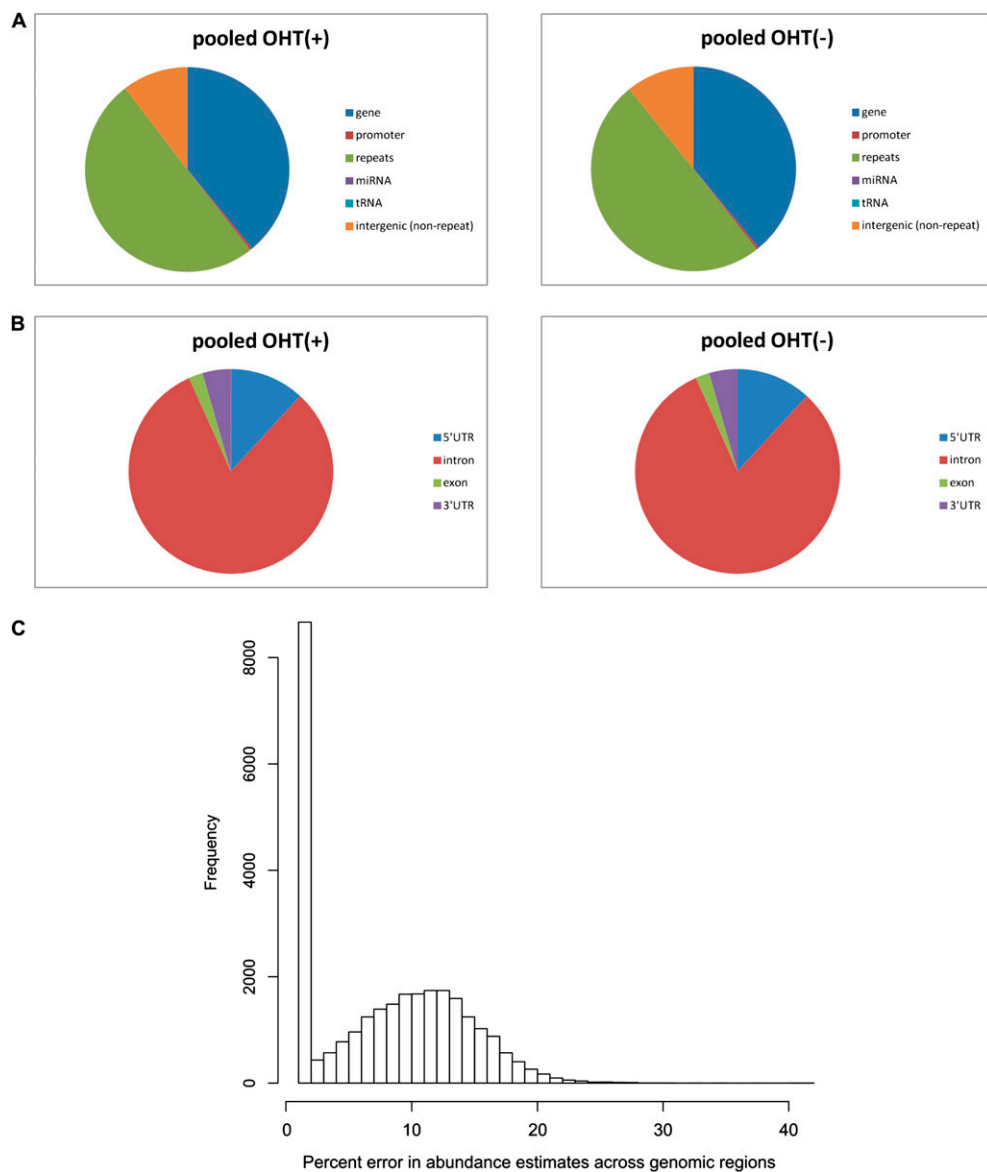

**Fig. S5.** Location of all mapped reads according to genome features (A) and distribution of gene-mapping reads to genomic locations (B). (C) Distribution of estimated percent error in abundance measurements across all analyzed genomic segments. The estimated percent error in breakage rates rarely exceeds 15–20%, enabling robust determination of significant differences.

**Table S1. AID targets identified by promoter assay**

| Gene           | Chromosome | Expression | Tilemap maxM/P | FDR value | Validation by qPCR | Translocation (partner gene)                                                              |
|----------------|------------|------------|----------------|-----------|--------------------|-------------------------------------------------------------------------------------------|
| <i>SNHG3</i>   | chr1       | +          | 8.18           | 0         | +                  | CML ( <i>PICALM</i> )                                                                     |
| <i>MALAT1</i>  | chr11      | +          | 7.05           | 0         | +                  | Renal cell carcinoma ( <i>TFEB</i> ), mesenchymal hamartoma of the liver ( <i>ACAT2</i> ) |
| <i>NIN</i>     | chr14      | +          | 6.25           | 0.08      | —                  | CML-like myeloproliferative disorder ( <i>PDGFRB</i> )                                    |
| <i>FYB</i>     | chr5       | —          | 6.25           | 0.08      | n.d                | —                                                                                         |
| <i>C2orf16</i> | chr2       | —          | 6.05           | 0.1       | —                  | —                                                                                         |
| <i>C9orf72</i> | chr9       | +          | 5.93           | 0.11      | —                  | —                                                                                         |
| <i>FAM119B</i> | chr12      | —          | 5.62           | 0.2       | n.d                | —                                                                                         |
| <i>CFLAR</i>   | chr2       | +          | 5.47           | 0.26      | +                  | —                                                                                         |
| <i>SNX25</i>   | chr4       | +          | 5.45           | 0.26      | —                  | —                                                                                         |
| <i>BCL7A</i>   | chr12      | +          | 3.53           | 0.83      | +                  | Burlitt lymphoma (IgH; <i>MYC</i> -IgH)                                                   |
| <i>CUX1</i>    | chr7       | +          | 3.51           | 0.83      | +                  | TLL ( <i>FGFR1</i> )                                                                      |

FDR < 0.3 plus *BCL7A* and *CUX1*. Chr, chromosome; CML, chronic myeloid leukemia; n.d, not done; TLL, T-lymphoblastic leukemia/lymphoma.



**Table S2. AID targets identified by sequencing**

| Gene           | Chromosome | Expression | FDR value | <i>P</i> value clustering* | Validation by qPCR | Translocation (partner gene)                                                              |
|----------------|------------|------------|-----------|----------------------------|--------------------|-------------------------------------------------------------------------------------------|
| <i>MALAT1</i>  | chr11      | +          | 0.027     | 12                         | +                  | Renal cell carcinoma ( <i>TFEB</i> ), mesenchymal hamartoma of the liver ( <i>ACAT2</i> ) |
| <i>SNHG3</i>   | chr1       | +          | 0.015     | 9                          | +                  | CML ( <i>PICALM</i> )                                                                     |
| <i>SIPA1L3</i> | chr19      | +          | 0.015     | 5                          | —                  | —                                                                                         |
| <i>KCNC2</i>   | chr12      | —          | 0.005     | 4                          | —                  | —                                                                                         |
| <i>ZNF451</i>  | chr6       | +          | 0.038     | 4                          | —                  | —                                                                                         |
| <i>TRIO</i>    | chr5       | +          | 0.050     | 4                          | —                  | —                                                                                         |
| <i>C5orf13</i> | chr5       | +          | 0.072     | 4                          | —                  | —                                                                                         |
| <i>CUL9</i>    | chr6       | +          | 0.077     | 4                          | —                  | —                                                                                         |
| <i>TM9SF4</i>  | chr20      | +          | 0.026     | 3                          | —                  | —                                                                                         |
| <i>ANKRD11</i> | chr16      | +          | 0.041     | 3                          | —                  | —                                                                                         |
| <i>MYO3B</i>   | chr2       | —          | 0.082     | 3                          | —                  | —                                                                                         |
| <i>UPF2</i>    | chr10      | +          | 0.093     | 3                          | —                  | —                                                                                         |
| <i>MET</i>     | chr7       | —          | 0.000     | 2                          | —                  | Gastric carcinoma ( <i>TPR</i> )                                                          |
| <i>AUTS2</i>   | chr7       | +          | 0.017     | 2                          | —                  | ALL ( <i>PAX5</i> )                                                                       |
| <i>RAD18</i>   | chr3       | +          | 0.038     | 1                          | —                  | —                                                                                         |
| <i>OTUD6B</i>  | chr8       | +          | 0.041     | 1                          | n.d                | —                                                                                         |
| <i>VPS13B</i>  | chr8       | +          | 0.044     | 1                          | —                  | —                                                                                         |
| <i>CCDC41</i>  | chr12      | +          | 0.055     | 1                          | —                  | —                                                                                         |
| <i>ECT2</i>    | chr3       | +          | 0.078     | 1                          | —                  | —                                                                                         |
| <i>MRPL49</i>  | chr11      | +          | 0.020     | 1                          | —                  | Close to t(11;17)(q13;q21) translocation in B-NHL                                         |
| <i>NECAB3</i>  | chr20      | +          | 0.029     | 1                          | —                  | —                                                                                         |
| <i>SETD8</i>   | chr12      | +          | 0.175     | 1                          | —                  | —                                                                                         |
| <i>SETBP1</i>  | chr18      | —          | 0.134     | 9                          | —                  | —                                                                                         |
| <i>PBLD</i>    | chr10      | —          | 0.254     | 8                          | —                  | —                                                                                         |
| <i>ABCG2</i>   | chr4       | —          | 0.220     | 8                          | —                  | —                                                                                         |
| <i>FAM65B</i>  | chr6       | +          | 0.195     | 8                          | —                  | —                                                                                         |
| <i>WBSCR17</i> | chr7       | —          | 0.162     | 8                          | —                  | —                                                                                         |
| <i>ERC1</i>    | chr12      | +          | 0.153     | 6                          | —                  | —                                                                                         |
| <i>PLD2</i>    | chr17      | +          | 0.102     | 5                          | —                  | —                                                                                         |

FDR < 0.1 and/or remarkable numbers of *P* value clusters. ALL, acute lymphocytic leukemia; B-NHL, B-cell non-Hodgkin lymphoma; Chr, chromosome; CML, chronic myeloid leukemia; n.d, not done.

\*Number of *P* value clusters corresponding to the FDR region.

**Table S3. Mutation analysis of genes with significant increase in break signal after AID activation**

|               | 4-OHT | Mutated clone | Unique mutations, bp | Total sequenced, bp | Mutation frequency ( $\times 10^{-4}$ ) | del(ins) (bp) | Del(ins)/total clones | <i>P</i> value       |
|---------------|-------|---------------|----------------------|---------------------|-----------------------------------------|---------------|-----------------------|----------------------|
| <i>B2M</i>    | —     | 1/82          | 1                    | 43,674              | 0.23                                    | 0             | 0/82                  | 0.52                 |
|               | +     | 2/87          | 2                    | 46,338              | 0.43                                    | 1             | 1/87                  |                      |
| $S_{\mu}$     | —     | 13/82         | 17                   | 67,404              | 2.52                                    | 1             | 1/82                  | $4.2 \times 10^{-7}$ |
|               | +     | 38/79         | 59                   | 64,938              | 9.09                                    | 33(1)         | 7(1)/79               |                      |
| V region      | —     | 18/123        | 21                   | 92,127              | 2.28                                    | 6             | 5/123                 | 0.001                |
|               | +     | 38/135        | 51                   | 101,115             | 5.04                                    | 8(10)         | 4(1)/135              |                      |
| <i>MYC</i>    | —     | 5/83          | 5                    | 41,251              | 1.21                                    | 0             | 0/83                  | $1.8 \times 10^{-7}$ |
|               | +     | 21/80         | 33                   | 39,760              | 8.30                                    | 0             | 0/80                  |                      |
| <i>SNHG3</i>  | —     | 3/77          | 3                    | 42,633              | 0.70                                    | 0             | 0/77                  | 0.0001               |
|               | +     | 16/74         | 21                   | 41,170              | 5.10                                    | 2             | 2/74                  |                      |
| <i>MALAT1</i> | —     | 3/89          | 3                    | 48,950              | 0.61                                    | 0             | 0/89                  | $8.1 \times 10^{-7}$ |
|               | +     | 19/90         | 30                   | 49,500              | 6.06                                    | 83(1)         | 3(1)/90               |                      |
| <i>BCL7A</i>  | —     | 3/84          | 3                    | 44,520              | 0.67                                    | 0             | 0/84                  | 0.006                |
|               | +     | 9/82          | 14                   | 43,460              | 3.22                                    | 0             | 0/82                  |                      |
| <i>CUX1</i> * | —     | 0/89          | 0                    | 48,149              | 0                                       | 0             | 0/89                  | 0.001                |
|               | +     | 8/91          | 11                   | 49,231              | 2.23                                    | 0             | 0/91                  |                      |
| <i>CUX1</i> † | —     | 13/85         | 14                   | 58,905              | 2.38                                    | 0             | 0/85                  | 0.007                |
|               | +     | 22/84         | 31                   | 58,212              | 5.33                                    | 4             | 4/84                  |                      |
| <i>CFLAR</i>  | —     | 0/134         | 0                    | 87,404              | 0                                       | 5             | 1/134                 | 0.004                |
|               | +     | 5/133         | 8                    | 86,878              | 0.92                                    | 1             | 1/133                 |                      |

Cells were treated with or without 4-OHT for 24 h. *P* values were calculated by one-sided Fisher's exact test.

\*Region detected by promoter array (Fig. S2).

†Region with highest peak of H3K4me3 (Fig. S4D).



**Table S4. Linker sequences**

|                               | Linker primers (5' to 3')                                                                                |
|-------------------------------|----------------------------------------------------------------------------------------------------------|
| Linker P1                     | <b>biotin</b> - TTCCACTACGCTCCGCTTTCCTCTCTATGGGCAGTCGGTGAT<br>ATCACCAGACTGCCCATAGAGAGGAAAGCGGAGGCGTAGTGG |
| Linker P2                     | AGAGAAATGAGGAACCCGGGCGAGTT<br>CTGCCCCGGGTTCCTCATTCTCT                                                    |
| Global amplification<br>(fwd) | CCACTACGCTCCGCTTTCCTCTCTATG                                                                              |
| (rev)                         | CTGCCCCGGGTTCCTCATTCT                                                                                    |
| P1-LM (LM-PCR)                | CCACTACGCTCCGCTTTCCTCTCTATG                                                                              |

**Table S5. Gene-specific primers (5' to 3')**

|                   | Forward                  | Reverse                  |
|-------------------|--------------------------|--------------------------|
| PCR               |                          |                          |
| S $\mu$           | GCACAGGCTCCTAAATTCCTGGTC | CAGGCTGGCTTCCATCTTTTGTCT |
| B2M               | CGGCTCTGCTTCCCTTAGAC     | CGAAACCGCTTTGTATCACA     |
| Mutation          |                          |                          |
| S $\mu$           | GACATGGTAAGAGACAGGCAGCCG | GGATGGAGTTGTCATGGCCAGAAA |
| BL2 V region      | ATCTCATGTGCAAGAAAATGAA   | AGTCCCACCACGCAATCAT      |
| MYC               | CCCTCAACGTTAGCTTACCAACA  | CGCTCAGATCCTGCAGGTACAA   |
| SNHG3             | GCCCAGGAGTGACCTATACTCAA  | GGTATCCACGTTGGAATGCTCA   |
| MALAT1            | GGCAGAAGGCTTTTGAAGA      | CAACATATTGCCGACCTCACGGAT |
| BCL7A             | ATTAGCTCTGGTCCGGCCGGTT   | GGTGCAGTCGTGCAAGTTTCT    |
| CUX1 <sup>a</sup> | GGAGCCAGGTTGAAGGTGA      | TGCCATTCCGGTGTGTTTCATTA  |
| CUX1 <sup>b</sup> | GCTTGATCGGAAATTGATCCTC   | GTCCGCGTCACCGACACAGG     |
| CFLAR             | CAGGGAAGTGTGTTAAGTGC     | CATGTTGTCTGAAGCCAGTGC    |
| B2M               | TCCTTTCTGGCCTGGAGGCTAT   | AGAGGTGCTAGGACATGCCAACTT |

**Table S6. Gene-specific primers LM-PCR (5' to 3')**

|           | First round               | Second round              |
|-----------|---------------------------|---------------------------|
| MYC 5'    | CCAAGCCGCTGGTTCATAA       | GAGATAGCAGGGGACTGTCCAAA   |
| MYC 3'    | GGCCCGTTAAATAAGCTGCCAA    | ATCCAGCCGCCCACTTTTGACA    |
| SNHG3 5'  | GCCCAGGAGTGACCTATACTCAA   | ATGAGGCCCTCGTTGAAA        |
| SNHG3 3'  | ACGTTGTGGAAAGGGACTGTACAT  | TAGTGAGGAATTGGAGTAACCGACA |
| MALAT1 5' | GCTTGAGAAGATGAGGGTGTTTA   | GGCAGAAGGCTTTTGAAGA       |
| MALAT1 3' | CAACATATTGCCGACCTCACGGATT | ACACTGGCATGCTGGTCTAGGAT   |
| BCL7A 5'  | TGAGGCCTCAAAGTGCTCCTTGT   | ACCAGGGGTCATTTGGGCAGTA    |
| BCL7A 3'  | GGTGCAGTCGTGCAAGTTTCT     | GGTCTCTTGACTTCTCCGAGTTGA  |
| CUX1 5'   | GACTCTGCCAGGTGGATGTTG     | GGAGCCAGGTTGAAGGTGA       |
| CUX1 3'   | AAATGCCATTCCGCTGTGTTT     | TGCCATTCCGGTGTGTTTCATTA   |

**Table S7. ChIP and qPCR primers (5' to 3')**

|              | Forward                        | Reverse                    |
|--------------|--------------------------------|----------------------------|
| <b>ChIP</b>  |                                |                            |
| V region 1   | TCACCTAGGCGCCACAGGAA           | CGCCACCAGCAGGAGGAAGA       |
| V region 2   | ATCTCATGTGCAAGAAAATGAAGCACCTGT | CCCTGGGATCAGAGGCAGCCTCCCA  |
| V region 3   | CTCACTGTGGGTTTTTCTGTTCACA      | GAGCCACCAGAGACAGTGCAGTGA   |
| V region 4   | CATCAGCAGTACTAATTACTACTTGAGTTG | CGACTCTCGAGGGATGGGTTGTAGT  |
| V region 5   | GTGAAGTCTTCGGAGACCTT           | ACATGGTGACTCGACTCTCG       |
| V region 6   | AGTCACCATGTCCGTAGACATGTCC      | AGTCCCCCCCCCTCGAGCCACTGGT  |
| V region 7   | CTGGTTCGACTCCTGGGGCCAGGGA      | ACACTTGACCCCGAGACCCCTGGCA  |
| V region 8   | TGGAGGCATTTTGGAGGTCAGGAAA      | CCAGCCGAAGGAGCCCCCTAGCTGC  |
| C $\mu$      | CTTCTTCCCCGACTCCATCAC          | CGTTCTTTTCTTTGTTGCCCT      |
| MALAT1 1     | AGAGCAGTGTAACACTTCTGGGTG       | TGGAAAAGCGAGTTCAAGTGGCCT   |
| MALAT1 2     | AGGTGATCGAATTCGGGTGATGCCA      | CAAGCTCCGCTGCCCCCTCAGCA    |
| MALAT1 3     | CATTTACTAAACGCAGACGAAAATG      | TTTCTTCGCCTTCCCGTACTTCTG   |
| MALAT1 4     | TTAGAAGGTAAAGCTTGAGAAGATG      | AGTCCTTTTAGTAGCTTTTGTAGTGT |
| MALAT1 5     | TTCAGTGAATCTAGGAAGACAGCAG      | CCTGGACTCTTTTCTATCTTCACCA  |
| MALAT1 6     | GATTTCCGGGTGTGTAGGTTTCTC       | AAACCCACAACCTTGCCATCTACTA  |
| MALAT1 7     | TGGCAATTAGTTGGCAGTGGCCTGT      | TCCATTCTAAGACTTTAAGTTCTCTG |
| MALAT1 8     | TGTCCTTAGAGGGTGGCTTTTGT        | GCATCTAGGCCATCATACTGCCAGGC |
| <b>qPCR</b>  |                                |                            |
| S $\mu$      | GACTGCAGGGAAGTGGGGTATCA        | GGATGGAGTTGTTCATGGCCAGAAA  |
| BL2 V region | GTCAGAGTCTTGGAGGCATTTTGG       | AATGCTCCAGGTGAAGCGGAGAGA   |
| MYC          | GCCGCGCCTCAGAGTGCAT            | CGGAGAGAAGGCGCTGGAGT       |
| SNHG3        | AAGCTGCCCTAGTGAAGTGTAGGAAG     | TAGTGAAGAAATGGAGTAACCGACA  |
| MALAT1       | AAAAGGATTCAGGAAGGAGCGAGT       | ACACTGGCATGCTGGTCTAGGAT    |
| BCL7A        | CGAGTCCCTAGCTCGCATTTGAA        | GGTGCAGTCTGGAAGTTTCT       |
| CUX1         | TTCTTGTCCTCGGCTTCCT            | GCACTGAAACTTCCATACCACAA    |
| CFLAR        | AAGGGACAGGTGCAGAAAGAGTAT       | CTCAACTCCAGCTGACACTGCTAAT  |
| SIPA1L3      | CTTTGCCAATGGATCTGTGTCTG        | GCCGACTCAGGAAGTGGTTC       |
| KCNC2        | GGGTCAGCCAATGCACCATTC          | GATGCAACAGCCACTCAGTAG      |
| ZNF451       | CCTTGTTCAAGATGCTCTGAGTG        | GCGCCAACATTTCAACAAGCAG     |
| TRIO         | GGAAATGAGGTCTCAGGGTTAAG        | TGTGGATGCTAAGGAACTGAG      |
| C5ORF13      | CTCTTGCGACAGCAGTTTCC           | GGTTTCTCCCTGTCAACATCAC     |
| CUL9         | GATCGCTGAGGTTAGCATACTG         | TTCTGTATCTCAAAGCTCCTTC     |
| TM9SF4       | CCAGCCATGCAAAGAATGTTC          | CCTCCAGCCTCTGTGTGTTC       |
| ANKRD11      | CACCAGATCACAGCATAAGCAC         | TTTGTGGAGACCAGCCCTTTG      |
| MYO3B        | CTTGGTCCAACCTTGTAGTTC          | GACTACTTGAATGATGGGCACAG    |
| UPF2         | TTGCCTCTGTCAGCAATGCTC          | AGAGAAAGACTGCCTGGAACAAG    |
| MET          | ATGAGGCTTGAAGAGAGAGGACAAC      | CACTCTGCCCTCTTCCAGTTC      |
| AUTS2        | AGCTCAAGCGATTCTCCCTC           | CACTCAGCACTATACCAACCAC     |
| RAD18        | GAGCCATACCACGACTGTGC           | TGCAGGGCAGTCAAGTTATTAGTG   |
| VPS13B       | GTTTCCTCCTACCCTACTCTAGC        | TTCCAAAGGTGTCTGGGTATC      |
| CCDC41       | GCAAAGACAGTCAAGAGACAG          | TGTGGACCTCAGAATCCTATC      |
| MRPL49       | AGGCAATCATGGAGGTACAAAC         | TGGTCTGCCTCTCAGGATTC       |
| NECAB3       | TCACGTACCTGCCTACTCAC           | TTGCTTTAGTTGCTGGCCATC      |
| SETD8        | CTGAAACAGCCACCAGAGTGAC         | AGCAAATGGTCTTGCAGAAGG      |
| SETBP1       | TCTGTACCTGTGTGTATCTTCCTG       | CCCATAGGTGACAAGCACCATC     |
| PBLD         | GGCCCTGATCTTTGTCCATTAAC        | GCCCGGCCAATAAGAGCTTC       |
| ABCG2        | TGCCACTTTATCCAGACCTAACTC       | ACTTACAGTTCTCAGCAGCTCTTC   |
| FAM65B       | AATTGCTGGCCAGTGTAGTG           | GTTTCAGTCTCTTGCCAGG        |
| WBSCR17      | GCACTAGGTGCTGTGCATAAAC         | TGCAAGCACCATGACTCAGC       |
| B2M          | CGGCTCTGCTTCCTTAGAC            | CGAAACCGCTTTGTATCACA       |
| MAP2K4       | TCTGGACATTTGAGGCAGCTCT         | AAGGAAATGGTCCCTAACAGGCT    |
| SH3KBP1      | CACGTCGAGACCTGCCATTTA          | GGGACTGCATGTTAGATGAGGA     |
| TUBA1B       | TCCATAACCTAGGGACTATCTGA        | TTGGGTGGAGTGACTGACAT       |
| RNMT         | GCTGAGTCTGAAACTTGT             | GTTTGGGATTTCTACAGCAAG      |
| EXO1         | GAGGATATTTGCCTGGCCAGAA         | GGTCTCAAGCCACAGTTTCAGA     |

**Table S8. Summary of general features of the sequenced libraries**

| Library       | Total reads | Total mapped reads | Percent mapped reads | Unique mapping reads | Unique reads, % | Redundancy ratio |
|---------------|-------------|--------------------|----------------------|----------------------|-----------------|------------------|
| OHT(-) rep. 1 | 83,122,708  | 51,939,756         | 62.49                | 40,459,228           | 77.90           | 1.28             |
| OHT(+) rep. 1 | 84,818,977  | 52,209,828         | 61.55                | 41,546,705           | 79.58           | 1.26             |
| OHT(-) rep. 2 | 82,502,113  | 53,683,520         | 65.07                | 42,994,281           | 80.09           | 1.25             |
| OHT(+) rep. 2 | 83,293,348  | 51,190,838         | 61.46                | 41,686,202           | 81.43           | 1.23             |
